# Supplementary material for: Carboxylation of multiwalled carbon nanotubes reduces their toxicity in primary human alveolar macrophages
Source: Royal Society of Chemistry journal article supplement (doi:10.1039/c6en00055j), 2016-01-01
Supplement: c6en00055j1.pdf [file c6en00055j1.pdf]

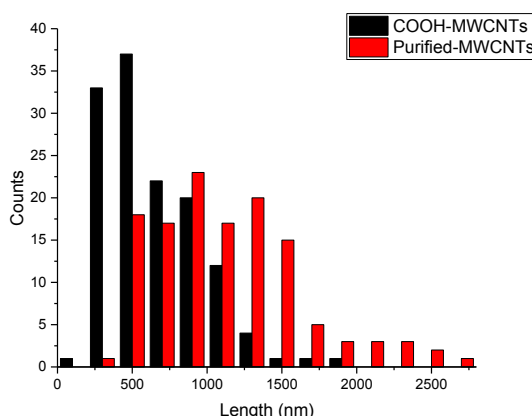

**Supplementary Figure S1.** The length distribution of COOH- and Purified-MWCNTs, obtained from over 100 SWCNTs imaged on independent positions across the specimen.

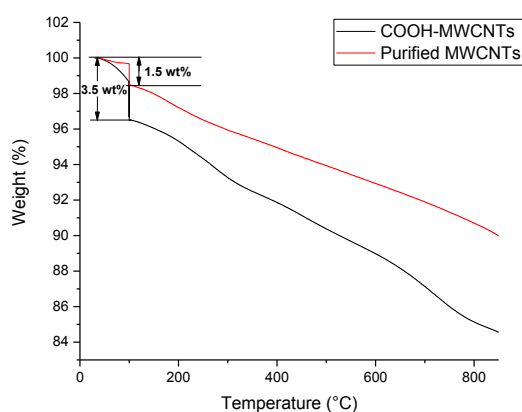

**Supplementary Figure S2.** TGA profile of COOH- and Purified-MWCNTs within the temperature range from 30 °C to 850 °C. The weight drop before and at 100 °C indicated moisture contents within the sample.

**Supplementary Table S1.** Elemental analysis by SEM-EDS and STEM-EDS.

| Sample          | SEM-EDS<br>(wt%) |         |         |         | STEM-EDS<br>(wt%) |     |     |
|-----------------|------------------|---------|---------|---------|-------------------|-----|-----|
|                 | C                | O       | Ni      | Fe      | C                 | O   | Ni  |
| Pristine-MWCNTs | 94.9±0.8         | 3.3±0.3 | 1.2±0.9 | 0.7±0.2 | 99.4              | 0.3 | 0.2 |
| COOH-MWCNTs     | 88.6±2.6         | 8±0.8   | 2.3±2.5 | 0.9±1.0 | 98.8              | 1.2 | 0   |

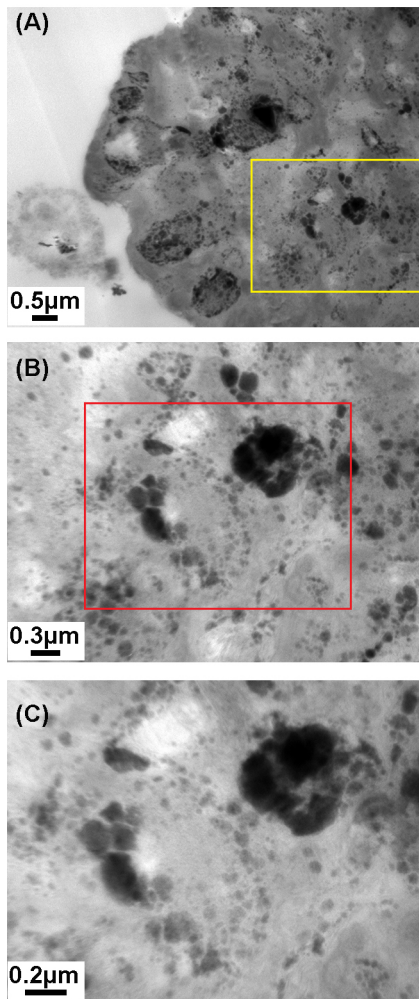

**Supplementary Figure S3** Electron micrograph of the non-treated AM: (A) low magnification image of non-treated AM showing some dark stained of proteins, which normally found within the cytoplasm and vesicles. (B) A high magnification of region of interest in the yellow square in (A). (C) A high magnification of region of interest in the red square in (B) showing dark stain of proteins without contamination of MWCNTs.

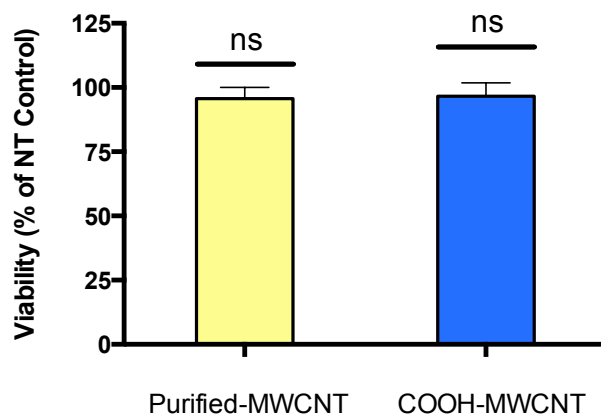

**Figure S4** Viability of AMs, after 4 hour treatment with Purified-MWCNT and COOH-MWCNT, as determined by the MTS assay. Cell viability data is presented as a % of the non-treated (NT) control (n=6)  $\pm$  SEM; significant differences between non-treated and treated AMs are indicated where \* $P < 0.05$ ; ns = non-significant.

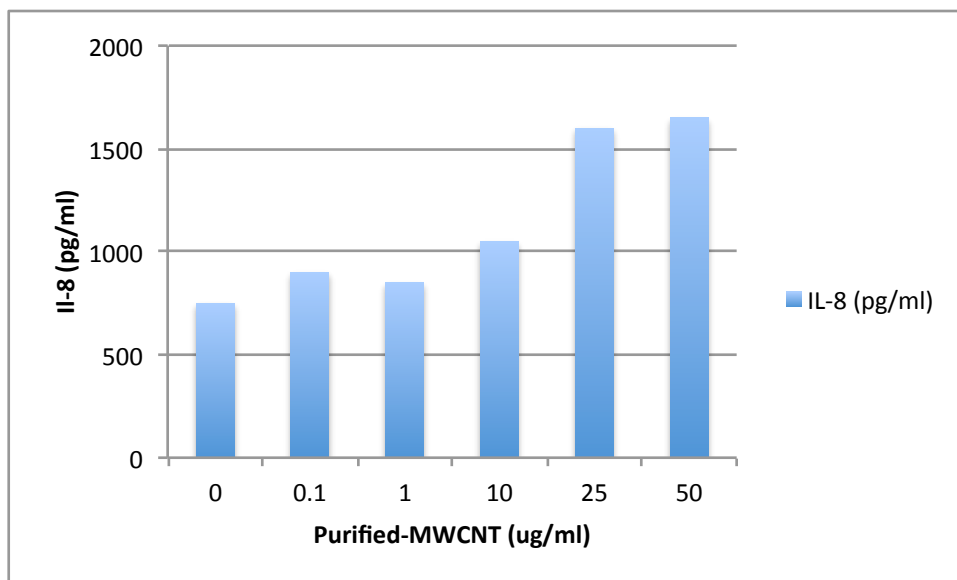

**Figure S5** IL-8 release from LPS pre-treated AMs following exposure to Purified-MWCNT (1 – 50  $\mu\text{g/ml}$ ). The 25  $\mu\text{g/ml}$  dose was chosen for further study because it induced the greatest magnitude of IL-8 release thus it would give us the best opportunity of seeing any differences in toxicity between the two MWCNT materials. 50  $\mu\text{g/ml}$  caused a substantial reduction in cell viability, thus was not used.

(A)

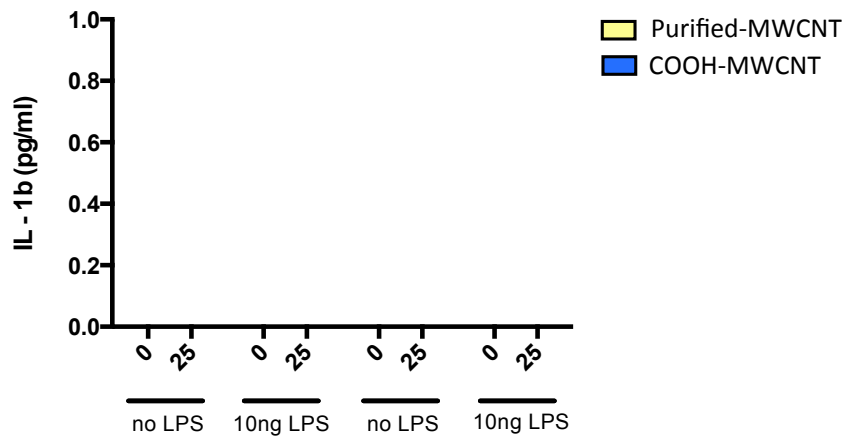

(B)

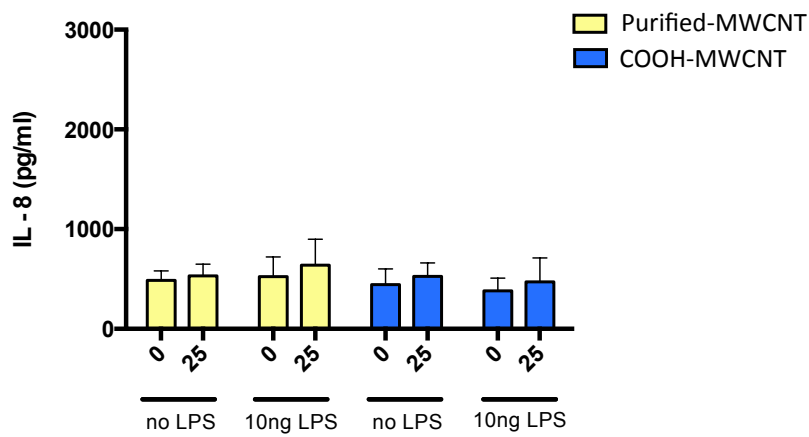

**Figure S6** Inflammatory mediator release from MWCNT-treated AMs. IL-1b (A) and IL-8 (B) release from AMs (with and without LPS priming), after 4 hour treatment with Purified-MWCNT and COOH-MWCNT. Mediator release is presented as pg/ml (n=6)  $\pm$  SEM; significant differences between non-treated and treated AMs are indicated where \*  $P < 0.05$  and \*\*  $P < 0.01$ .

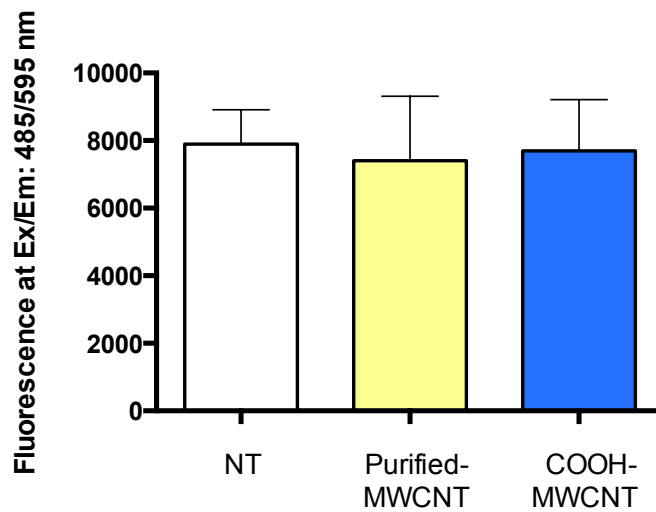

**Figure S7** Lysosomal integrity (and/or lysosome numbers) of non-treated AMs and Purified-MWCNT and COOH-MWCNT treated AMs after 4 hours, determined by Lysotracker probe. Graphical representation of measured fluorescence at Ex/Em 485/595 nm is shown.  $n=6 \pm \text{SEM}$ ; significant differences between non-treated and treated AMs are indicated where  $*P < 0.05$ .

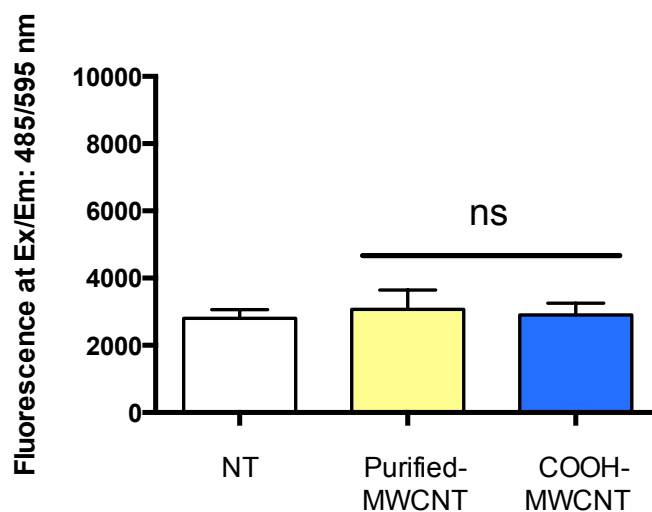

**Figure S8** Generation of reactive oxygen species in AMs. ROS measured in AMs after 4 hour treatment with Purified-MWCNT and COOH-MWCNT, determined by the fluorescent DHE probe assay (Ex/Em 485/595);  $n=6 \pm \text{SEM}$ ; significant differences between non-treated and treated AMs are indicated where  $*P < 0.05$ ; ns = non-significant.

**(A)**

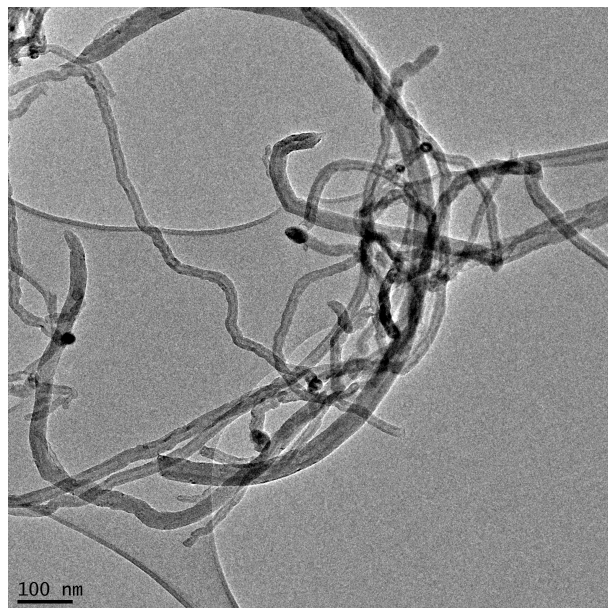

**(B)**

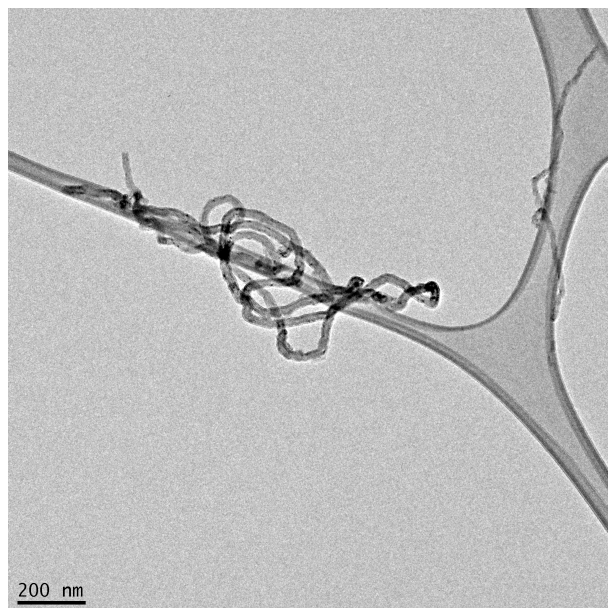

**Supplementary Figure S9** Electron micrograph overviews of (A) Purified-MWCNT and (B) COOH-MWCNT
